# Supplementary material
Source: Royal Society of Chemistry journal article supplement (doi:10.1039/d6nr01802e)
Supplement: d6nr01802e1.pdf [file d6nr01802e1.pdf]

**Theoretical Insights into Ion Transport Mechanisms in Fluoroacetonitrile-Based  
Electrolytes for Li/Na/K Ion Batteries: A Molecular Dynamics and Quantum  
Chemical Study**

Hang Liu<sup>ab</sup>, Yi Huang<sup>a</sup>, Siquan Li<sup>b</sup>, Juan Yang<sup>b</sup>, Pengjun Ma<sup>b</sup>, Xu Zhang<sup>b</sup>, Anmin Liu<sup>c</sup>,  
Cuiying Lu<sup>d</sup>, Peiyu Wang<sup>a\*</sup>, Bingjun Yang<sup>b\*</sup>, Xingbin Yan<sup>e</sup>

<sup>a</sup>College of Electric Engineering, Key Laboratory for Electronic Materials of Northwest  
Minzu University, Gansu Engineering Research Center of Ecological Environment  
Intelligent Networking. Northwest Minzu University, Lanzhou, Gansu 730030, PR  
China

<sup>b</sup>Key Laboratory of Energy Conservation and Energy Storage Materials of Gansu  
Province, Research Center for Resource Chemistry and Energy Materials, State Key  
Laboratory of Solid Lubrication, Lanzhou Institute of Chemical Physics, Chinese  
Academy of Sciences, Lanzhou 730000, China

<sup>c</sup>School of Chemical Engineering, Ocean and Life Sciences, Dalian University of  
Technology, Panjin 124221, China.

<sup>d</sup>School of Chemistry and Chemical Engineering, Yulin University, Yulin 718500,  
China

<sup>e</sup>School of Materials Science and Engineering, Sun Yat-Sen University, Guangzhou  
510275, China

\*Corresponding author: yangbj@licp.cas.cn(B.J.Yang); wangpy03@126.com  
(P.Y.Wang);

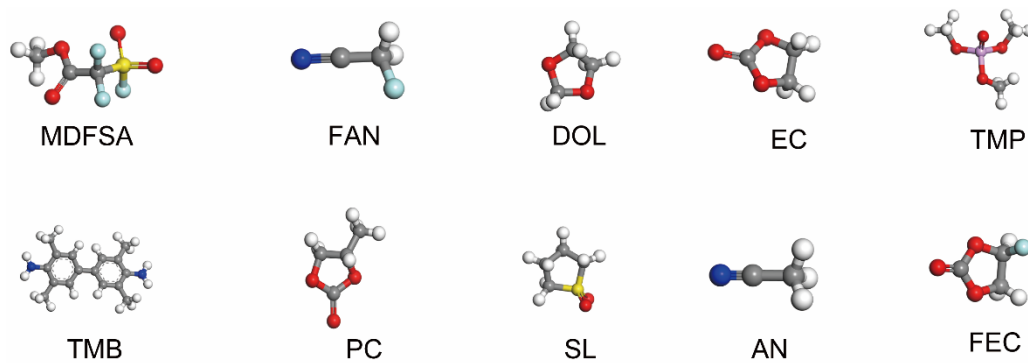

**Figure S1.** Solvent molecular models.

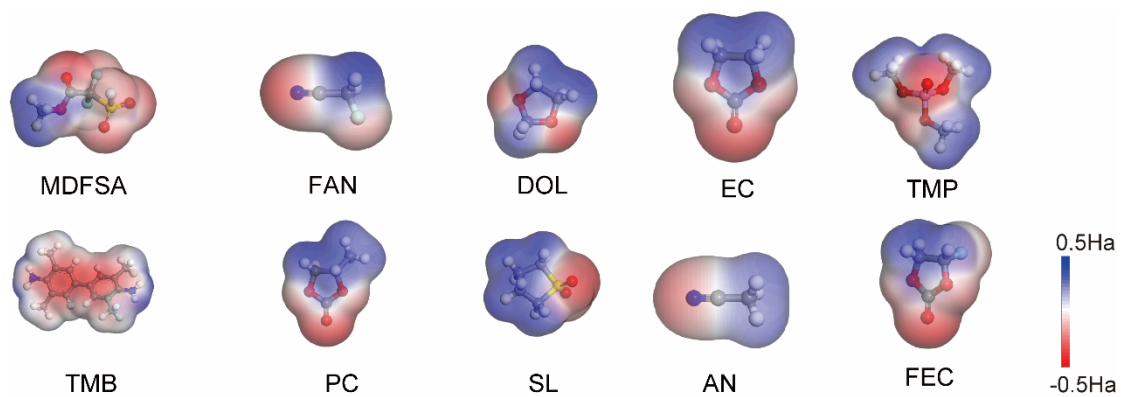

**Figure S2.** Electrostatic potential of solvent molecules

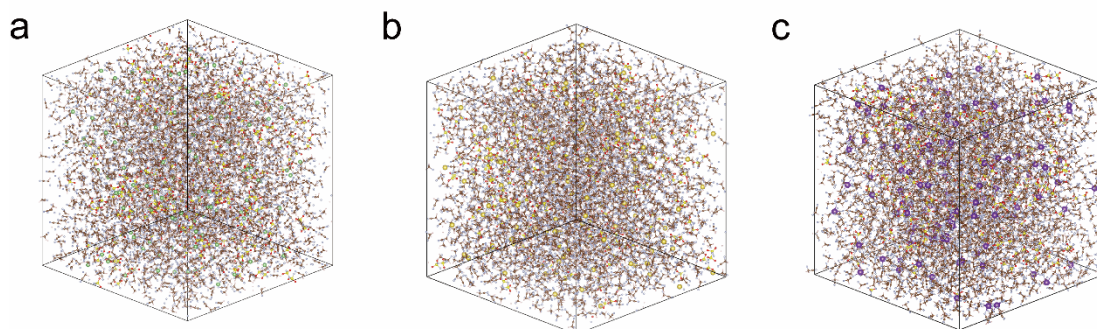

**Figure S3.** Snapshots of the molecular dynamics (MD) simulation of (a) LiFSI/FAN (b)

NaFSI/FAN and (c) KFSI/FAN.

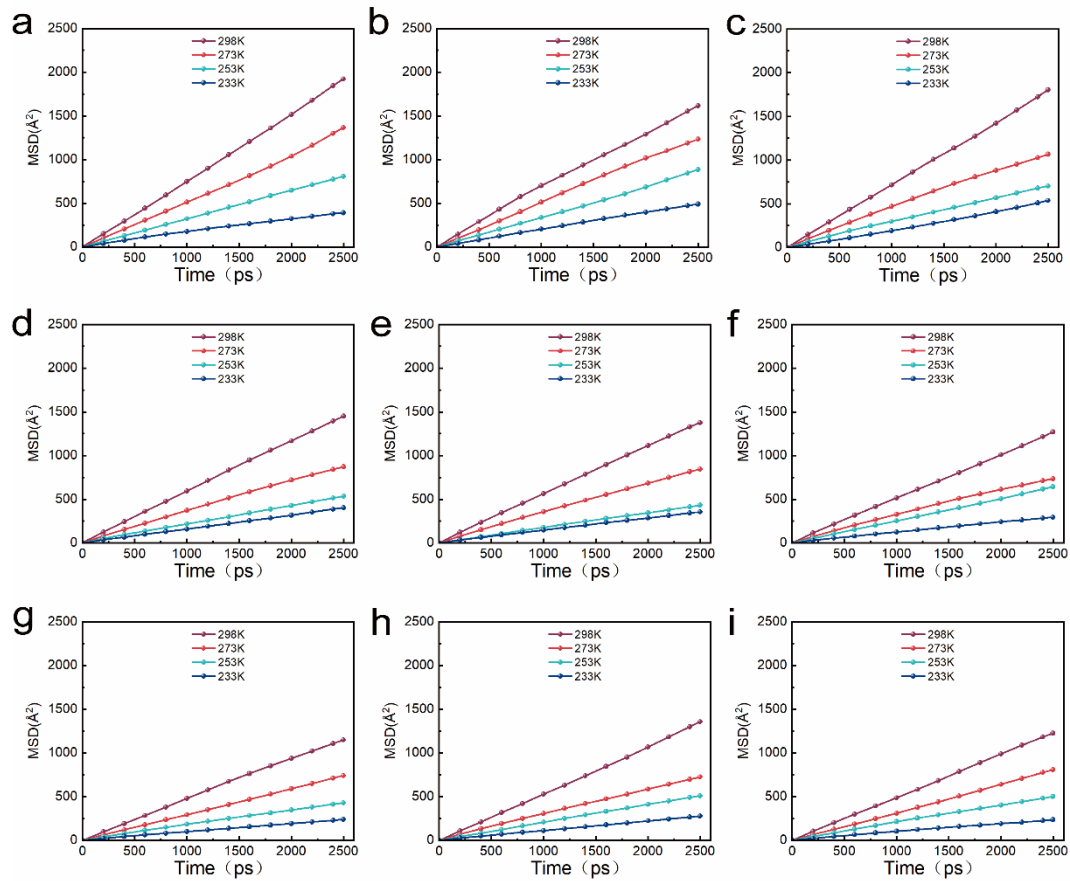

**Figure S4.** Mean squared displacement (MSD) of  $\text{Li}^+$ ,  $\text{Na}^+$  and  $\text{K}^+$  ions from MD simulations of the electrolytes at various temperatures. (a-c) MSD plots for (a)  $\text{Li}^+$ , (b)  $\text{Na}^+$  and (c)  $\text{K}^+$  ions at a concentration of 0.5 M. (d-f) MSD plots for (d)  $\text{Li}^+$ , (e)  $\text{Na}^+$  and (f)  $\text{K}^+$  ions at a concentration of 2 M. (g-i) MSD plots for (g)  $\text{Li}^+$ , (h)  $\text{Na}^+$  and (i)  $\text{K}^+$  ions at a concentration of 3 M.

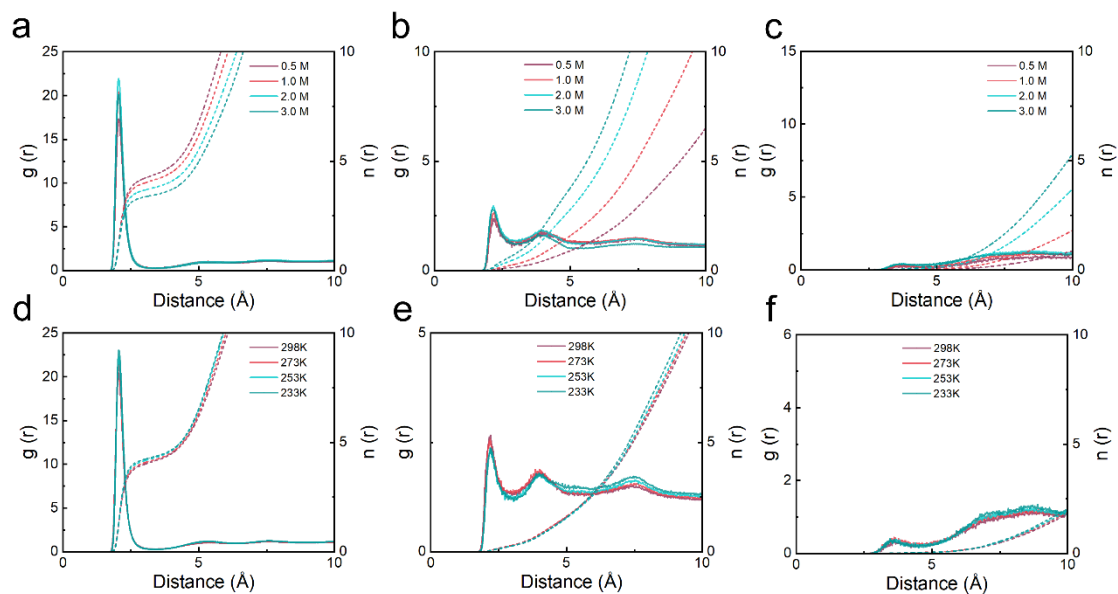

**Figure S5.** Radial distribution functions and coordination numbers of  $\text{Li}^+$  with (a) N atoms, (b) O atoms, and (c)  $\text{Li}^+$  in LiFSI/FAN electrolytes at 298 K and various concentrations; radial distribution functions and coordination numbers of  $\text{Li}^+$  with (a) N atoms, (b) O atoms, and (c)  $\text{Li}^+$  in LiFSI/FAN electrolytes at 1 M concentration and various temperatures.

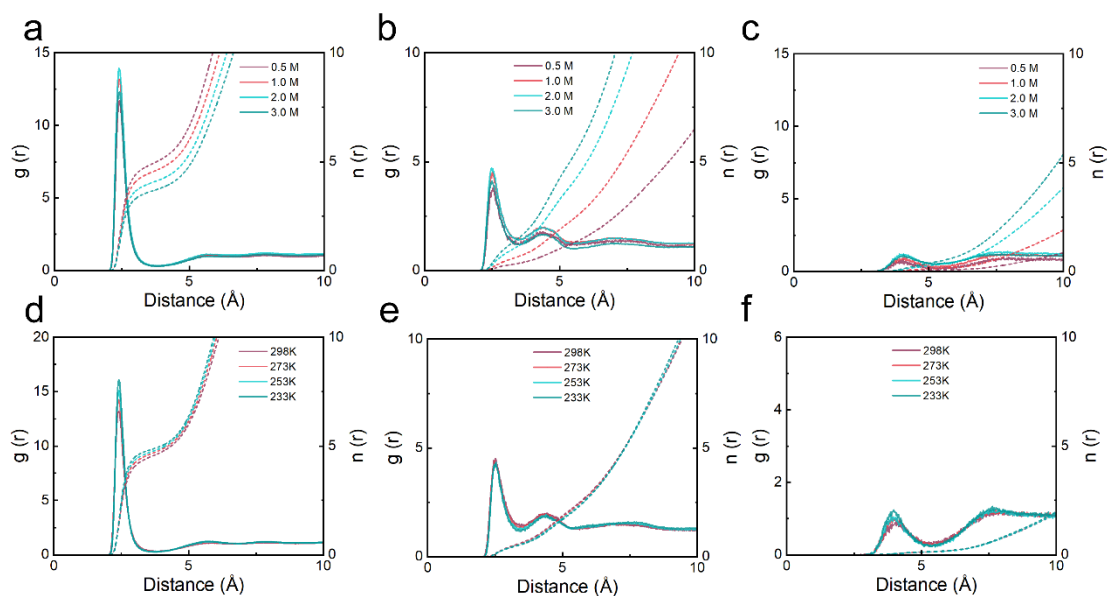

**Figure S6.** Radial distribution functions and coordination numbers of  $\text{Na}^+$  with (a) N atoms, (b) O atoms, and (c)  $\text{Na}^+$  in NaFSI/FAN electrolytes at 298 K and various concentrations; radial distribution functions and coordination numbers of  $\text{Na}^+$  with (a) N atoms, (b) O atoms, and (c)  $\text{Na}^+$  in NaFSI/FAN electrolytes at 1 M concentration and various temperatures.

in NaFSI/FAN electrolytes at 1 M concentration and various temperatures.

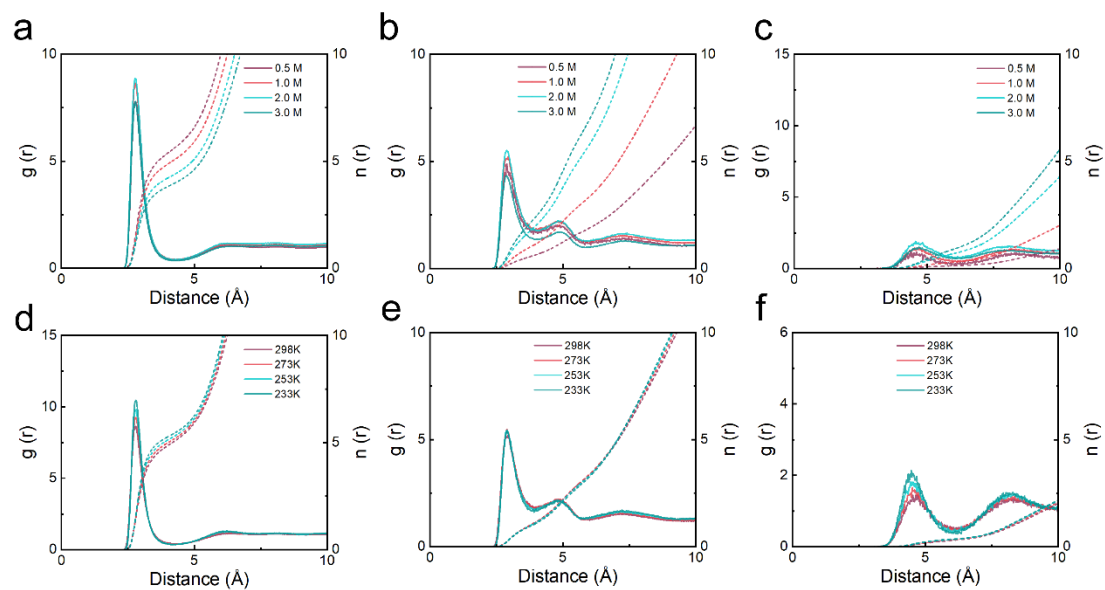

**Figure S7.** Radial distribution functions and coordination numbers of  $K^+$  with (a) N atoms, (b) O atoms, and (c)  $K^+$  in KFSI/FAN electrolytes at 298 K and various concentrations; radial distribution functions and coordination numbers of  $K^+$  with (a) N atoms, (b) O atoms, and (c)  $K^+$  in KFSI/FAN electrolytes at 1 M concentration and various temperatures.

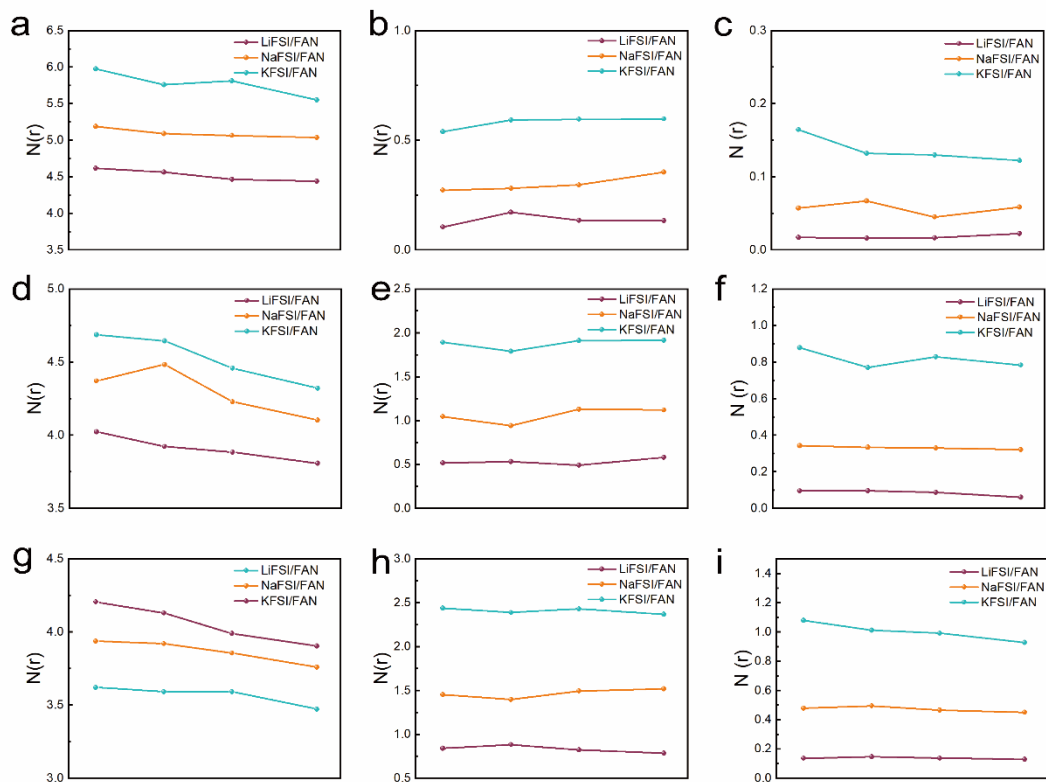

**Figure S8.** Coordination numbers (CN) of  $\text{Li}^+$ ,  $\text{Na}^+$  and  $\text{K}^+$  ions with the nitrogen (N) atom of the FAN solvent and oxygen (O) atoms of the  $\text{FSI}^-$  anion. (a-c) CN as a function of temperature at 0.5 M: (a)  $\text{Li}^+$ , (b)  $\text{Na}^+$  and (c)  $\text{K}^+$ . (d-f) CN as a function of temperature at 2 M: (d)  $\text{Li}^+$ , (e)  $\text{Na}^+$  and (f)  $\text{K}^+$ . (g-i) CN as a function of temperature at 3 M: (g)  $\text{Li}^+$ , (h)  $\text{Na}^+$  and (i)  $\text{K}^+$ .

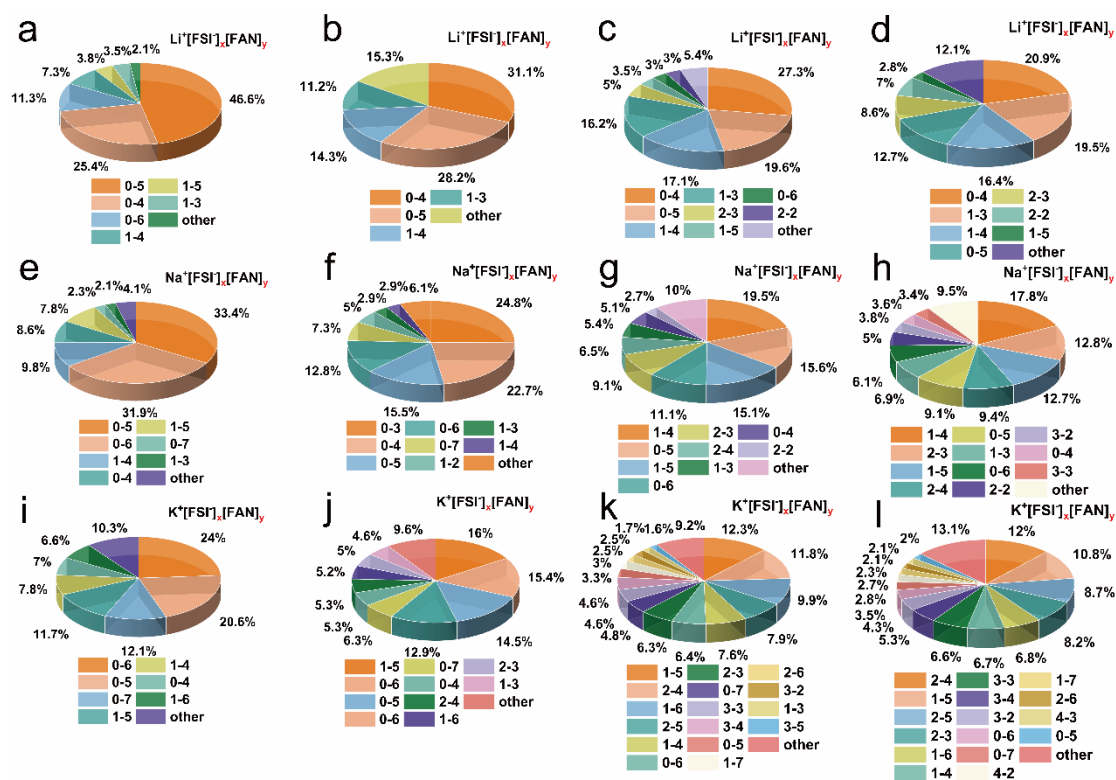

**Figure S9.** Analysis of the first solvation shell of  $\text{Li}^+$  in LiFSI/FAN electrolytes at concentrations of (a) 0.5 M, (b) 1 M, (c) 2 M, and (d) 3 M (233 K). (e-h) First solvation shell structure of  $\text{Na}^+$  in NaFSI/FAN electrolytes at corresponding concentrations of (e) 0.5 M, (f) 1 M, (g) 2 M, and (h) 3 M (233 K). (i-l) First solvation shell structure of  $\text{K}^+$  in KFSI/FAN electrolytes at corresponding concentrations of 0.5 M, 1 M, 2 M, and 3 M (233 K).

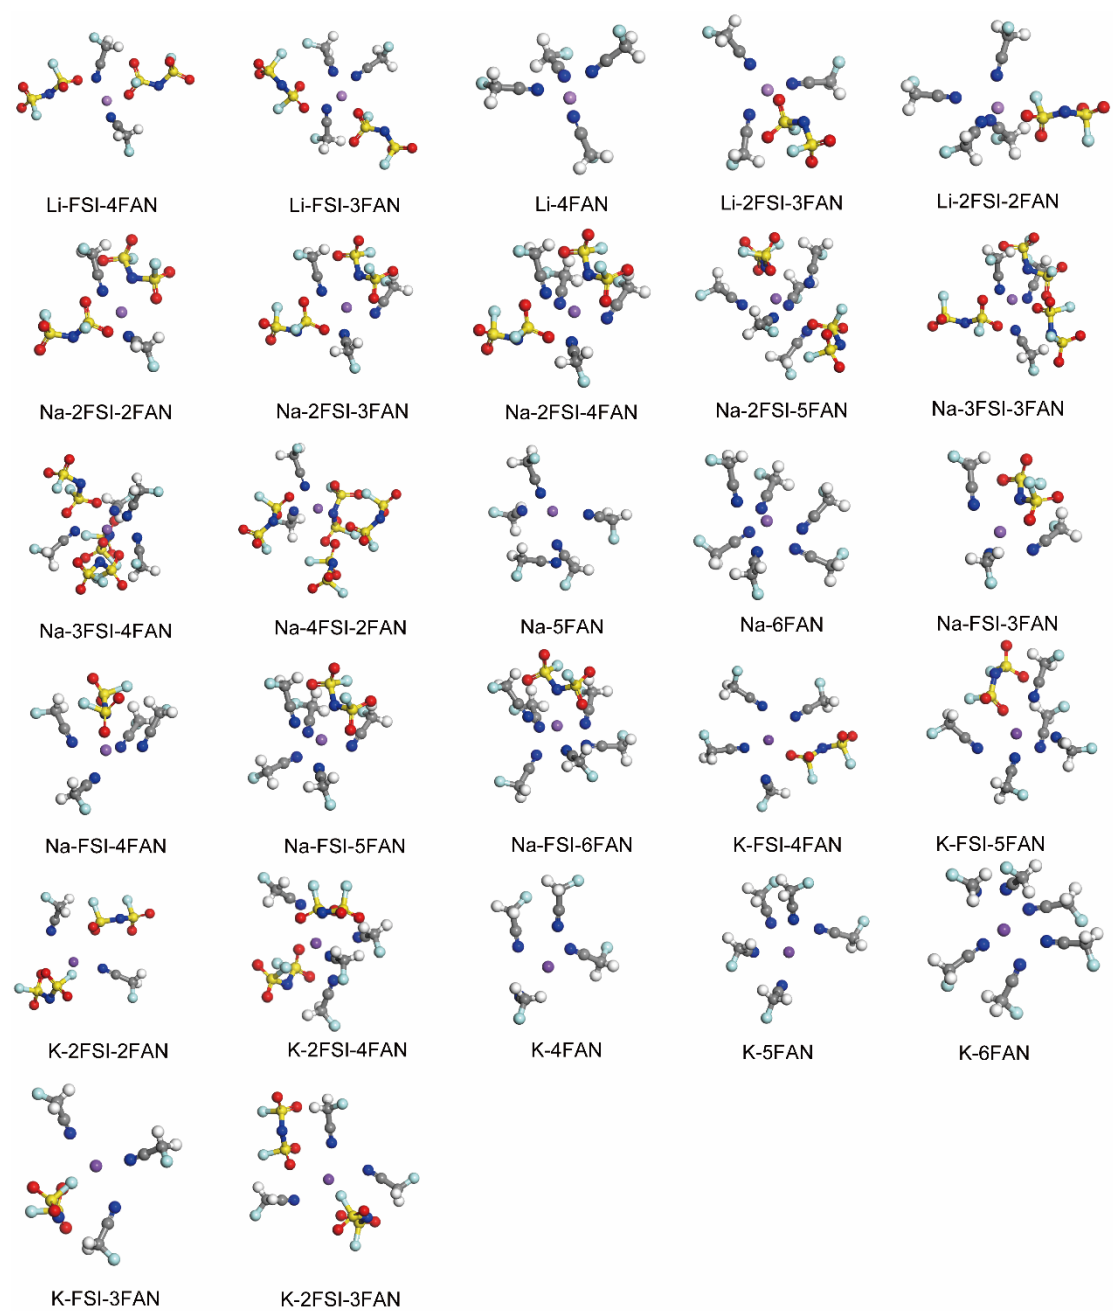

**Figure S10.** Solvation structures in the three FAN-based electrolytes containing different alkali metal ions ( $\text{Li}^+$ ,  $\text{Na}^+$ ,  $\text{K}^+$ ).

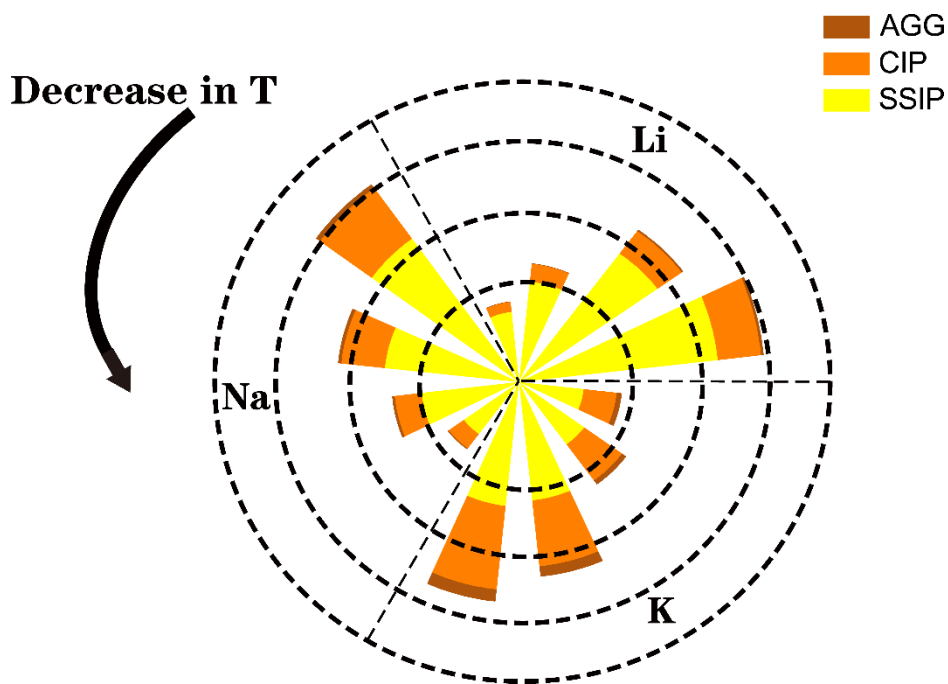

**Figure S11.** Ionic conductivity as a function of electrolyte composition at a concentration of 0.5

M. (The column heights represent the magnitude of ionic conductivity).

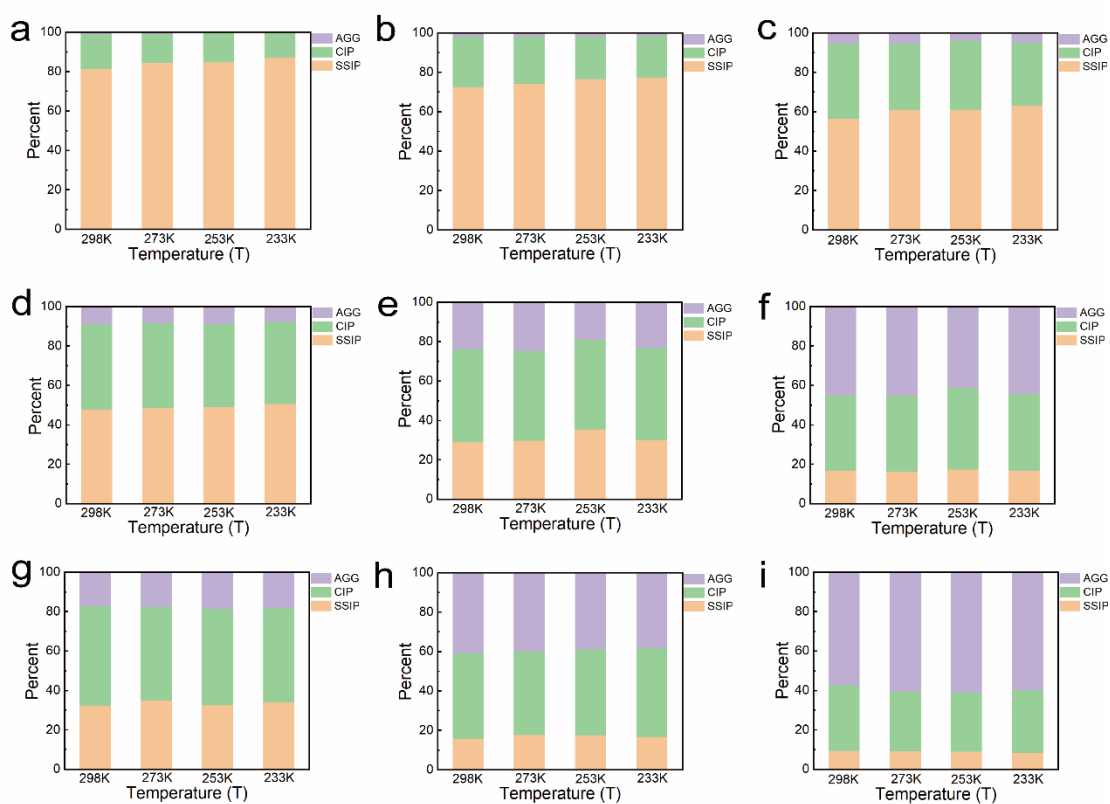

**Figure S12.** Proportion of various solvation structures as a function of temperature. (a-c) Proportions in the 0.5 M electrolyte, (d-f) Proportions in the 2 M electrolyte and (g-i) Proportions in the 3 M

electrolyte.

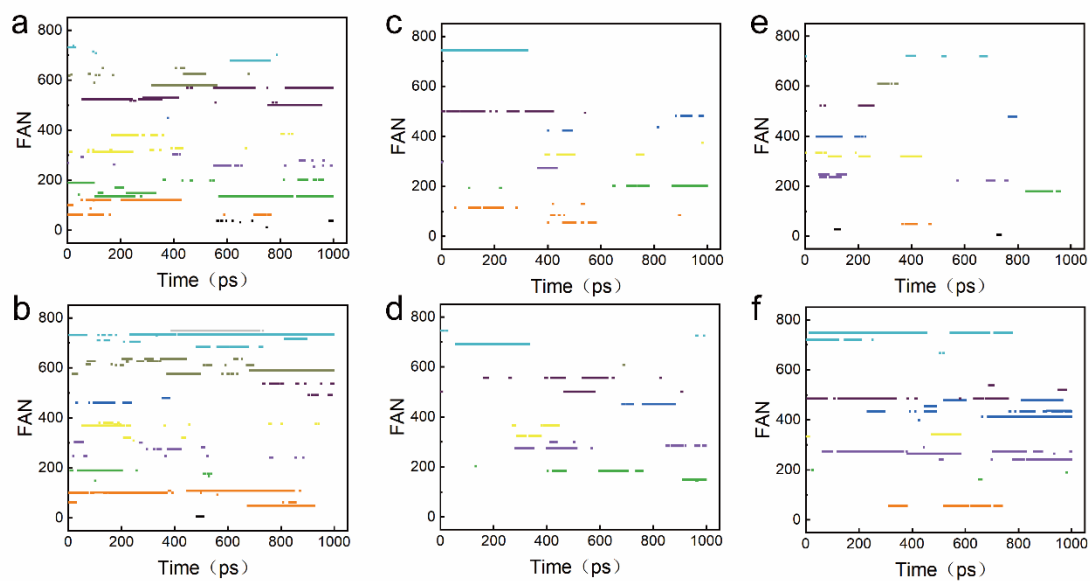

**Figure S13.** The vertical axis represents the index of solvent molecules coordinating to the central ion throughout the 1000 ps simulation. Horizontal bars indicate the residence time of N (from FAN) within the 3.0 Å cutoff distance of the ion. (a-c) Evolution of the solvation environments around alkali metal ions in 3 M electrolytes at 298 K: (a) Li<sup>+</sup>, (b) Na<sup>+</sup> and (c) K<sup>+</sup>. (d-f) Corresponding evolution at 233 K: (d) Li<sup>+</sup>, (e) Na<sup>+</sup> and (f) K<sup>+</sup>.

Table S1 Detailed composition of the LiFSI/FAN electrolyte at four different concentrations

| System         | Li <sup>+</sup> | FSI <sup>-</sup> | FAN  |
|----------------|-----------------|------------------|------|
| 0.5 M LiFSIFAN | 50              | 50               | 1797 |
| 1.0 M LiFSIFAN | 125             | 125              | 2246 |
| 2.0 M LiFSIFAN | 125             | 125              | 1123 |
| 3.0 M LiFSIFAN | 125             | 125              | 749  |

Table S2 Detailed composition of the NaFSI/FAN electrolyte at four different concentrations

| System         | Na <sup>+</sup> | FSI <sup>-</sup> | FAN  |
|----------------|-----------------|------------------|------|
| 0.5 M NaFSIFAN | 50              | 50               | 1797 |
| 1.0 M NaFSIFAN | 125             | 125              | 2246 |
| 2.0 M NaFSIFAN | 125             | 125              | 1123 |
| 3.0 M NaFSIFAN | 125             | 125              | 749  |

Table S3 Detailed composition of the KFSI/FAN electrolyte at four different concentrations

| System        | K <sup>+</sup> | FSI <sup>-</sup> | FAN  |
|---------------|----------------|------------------|------|
| 0.5 M KFSIFAN | 50             | 50               | 1797 |
| 1.0 M KFSIFAN | 125            | 125              | 2246 |
| 2.0 M KFSIFAN | 125            | 125              | 1123 |
| 3.0 M KFSIFAN | 125            | 125              | 749  |

Table S4 IUPAC Names and sizes of the solvent molecules used

| Abbreviations | Name                                        | Shell volume (Å <sup>3</sup> ) |
|---------------|---------------------------------------------|--------------------------------|
| MDFBA         | Methyl2,2-difluoro-2(fluorosulfonyl)acetate | 439.87 Å <sup>3</sup>          |
| FAN           | Fluoroacetonitrile                          | 119.19 Å <sup>3</sup>          |
| DOL           | 1,3-Dioxolane                               | 168.53 Å <sup>3</sup>          |
| EC            | Ethylene carbonate                          | 166.28 Å <sup>3</sup>          |
| TMP           | Trimethyl phosphate                         | 343.33 Å <sup>3</sup>          |
| TMB           | Trimethyl borate                            | 674.31 Å <sup>3</sup>          |
| PC            | Propylene carbonate                         | 263.11 Å <sup>3</sup>          |

---

|     |                          |                       |
|-----|--------------------------|-----------------------|
| SL  | Sulfolane                | 265.13 Å <sup>3</sup> |
| AN  | Acetonitrile             | 101.27 Å <sup>3</sup> |
| FEC | Fluoroethylene carbonate | 179.37 Å <sup>3</sup> |

---
